# Supplementary material for: Enhancing solar-to-hydrogen efficiency with an S-scheme GaTe/PtS2 van der Waals heterojunction with high light absorption
Source: Royal Society of Chemistry journal article supplement (doi:10.1039/d3cy00610g), 2023-01-01
Supplement: d3cy00610g1.pdf [file d3cy00610g1.pdf]

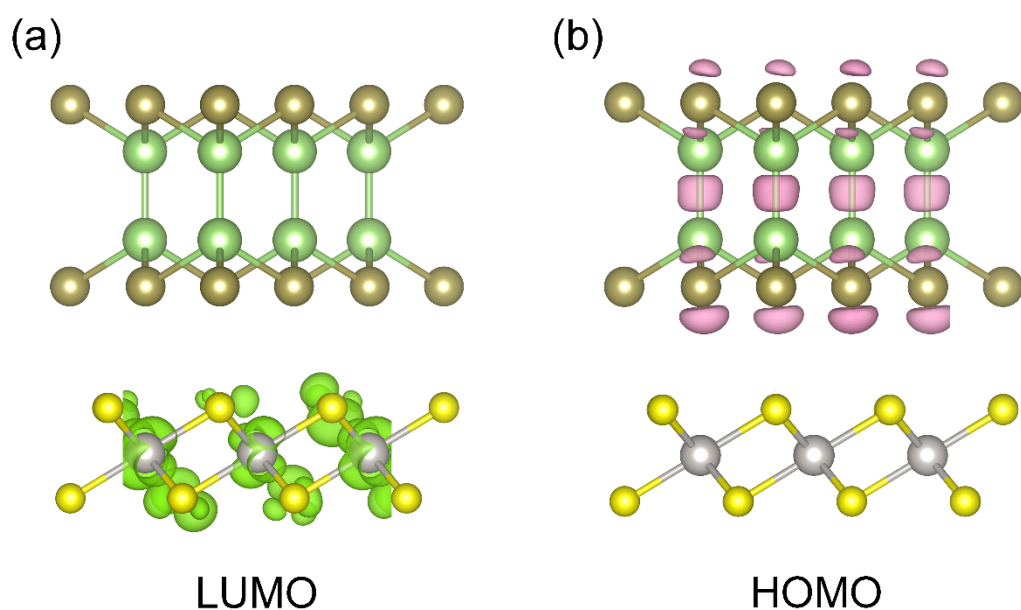

Figure S1 (a) Side view of the LUMO and HOMO of the GaTe/PtS<sub>2</sub> heterojunction, with the isosurface value of 0.005e Å<sup>-3</sup>.

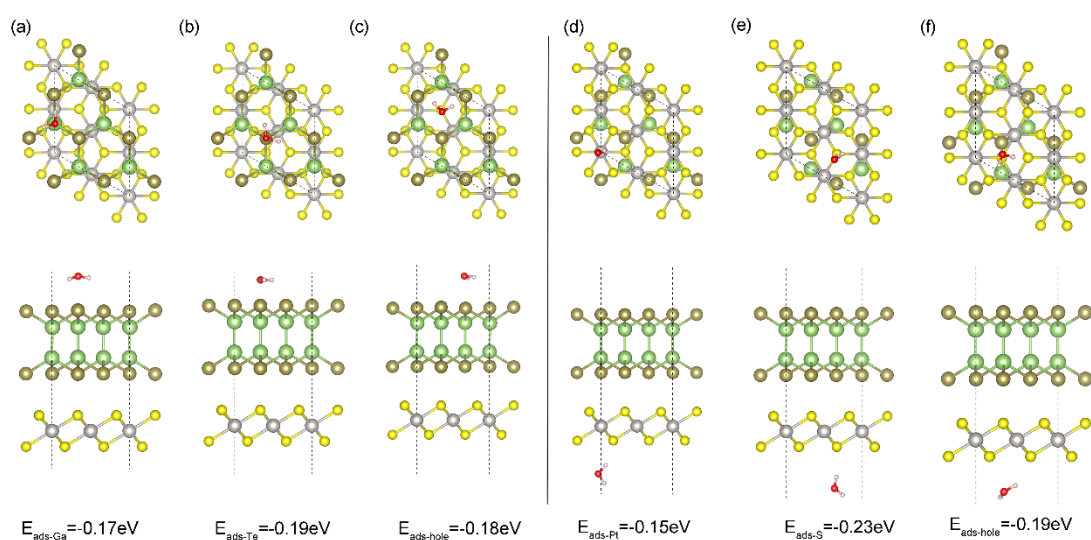

Figure S2 The relaxed structures and adsorption energies of adsorbed H<sub>2</sub>O molecules at different sites on (a)-(c) GaTe surface and (d)-(f) PtS<sub>2</sub> surface, respectively.
